# Supplementary material for: Mastication in Patients with Spinal Muscular Atrophy Types 2 and 3 is Characterized by Abnormal Efficiency, Reduced Endurance, and Fatigue
Source: Springer Nature journal article supplement (doi:10.1007/s00455-021-10351-y), 2021-08-15
Supplement: MOESM1 [file 19571942]

# Diagnostic list for Dysphagia and Dysarthria in (pediatric) Patients with Neuromuscular Diseases (DDD(p)NMD)

---

|                                                                                                      |          |
|------------------------------------------------------------------------------------------------------|----------|
| Are you often ill as a result of swallowing problems ?                                               | Yes - No |
| Do you suffer from respiratory infections?                                                           | Yes - No |
| Do you use antibiotics on a long-term basis?                                                         | Yes - No |
| Do specific foods cause problems with swallowing?                                                    | Yes - No |
| Swallowing problems:                                                                                 |          |
| <input type="checkbox"/> never occur;                                                                |          |
| <input type="checkbox"/> occur with solid foods;                                                     |          |
| <input type="checkbox"/> occur with pureed food and thick liquids;                                   |          |
| <input type="checkbox"/> occur both with liquids and solid foods.                                    |          |
| Do you dread mealtimes?                                                                              | Yes - No |
| Do you sometimes refuse food?                                                                        | Yes - No |
| Do you adapt food, for instance by cutting it into small pieces, pureeing it or avoiding hard foods? | Yes - No |
| Do you experience difficulty with chewing?                                                           | Yes - No |
| Do your jaws get tired when chewing?                                                                 | Yes - No |
| Do mealtimes take a long time (longer than 30 minutes)?                                              | Yes - No |
| Do you tend to choke ('yes' if you choke more than once a day)                                       | Yes - No |
| Do you tend to gag or vomit?                                                                         | Yes - No |
| Do you cough when swallowing solid foods?                                                            | Yes - No |

|                                                                       |          |
|-----------------------------------------------------------------------|----------|
| Do you cough when swallowing liquids?                                 | Yes - No |
| Do you feel as if food is sticking in your throat?                    | Yes - No |
| The feeling of food sticking in the throat:                           |          |
| <input type="checkbox"/> Does not occur;                              |          |
| <input type="checkbox"/> Occurs with solid foods;                     |          |
| <input type="checkbox"/> Occurs with pureed and thick liquids;        |          |
| <input type="checkbox"/> Occurs with both liquids and solid foods.    |          |
| Do you experience excessive burping?                                  | Yes - No |
| Do you get tired when eating?                                         | Yes - No |
| When you eat do you tend to drool?                                    | Yes - No |
| Is your mouth often open?                                             | Yes - No |
| Is your mouth opening limited for brushing teeth?                     | Yes - No |
| Do you experience jaw problems with biting off a large piece of food? | Yes - No |
| Do you experience jaw problems with biting off hard foods ?           | Yes - No |
| Do you experience jaw problems when yawning?                          | Yes - No |
| Do you experience jaw problems when laughing?                         | Yes - No |
| Do you experience jaw problems when you are tired?                    | Yes - No |
| Do you experience jaw problems when you are waking up?                | Yes - No |
| Is your daily intake for solid foods sufficient?                      | Yes - No |
| Is your daily intake of liquids sufficient?                           | Yes - No |
| Do you make (partial) use of tube feeding?                            | Yes - No |
| Are you gaining too much weight?                                      | Yes - No |
| Are you losing weight?                                                | Yes - No |
| Is your weight too low                                                | Yes - No |

|                                                                                        |          |
|----------------------------------------------------------------------------------------|----------|
| Is (or was) a dietician involved?                                                      | Yes - No |
| Do you suffer from shortness of breath when talking?                                   | Yes – No |
| Do you get tired when talking?                                                         | Yes – No |
| When you talk to people, do they ask you to repeat what you said?                      | Yes – No |
| Do people have problems understanding you when you are talking in a noisy environment? | Yes – No |
| Do you suffer from a sore throat due to talking?                                       | Yes – No |
| Is your voice loud enough?                                                             | Yes - No |
