# Supplementary material for: Mastication in Patients with Spinal Muscular Atrophy Types 2 and 3 is Characterized by Abnormal Efficiency, Reduced Endurance, and Fatigue
Source: Springer Nature journal article supplement (doi:10.1007/s00455-021-10351-y), 2021-08-15

Supplementary file 2

**Paper:** Mastication in patients with spinal muscular atrophy types 2 and 3 is characterized by abnormal efficiency, reduced endurance and fatigue

**Journal:** Dysphagia

**Authors:** A.M.B. van der Heul, MSc<sup>1</sup>, R.P.A. van Eijk<sup>1,2</sup>, MD, PhD, R.I. Wadman, MD, PhD<sup>1</sup>, F. Asselman, MSc<sup>1</sup>, I. Cuppen, MD, PhD<sup>1</sup>, R.A.J. Nivelstein MD, PhD<sup>3</sup>, E. Gerrits, PhD<sup>4</sup>, W.L. van der Pol, MD, PhD<sup>1\*</sup>, L. van den Engel-Hoek, PhD<sup>5\*</sup>

Z-scores of the TOMASS for patients with SMA type 2 and 3. A: discrete bites; B: masticatory cycles; C: swallows; D: total time needed to finish the cracker. The circles refer to ambulant patients

A. Discrete bites

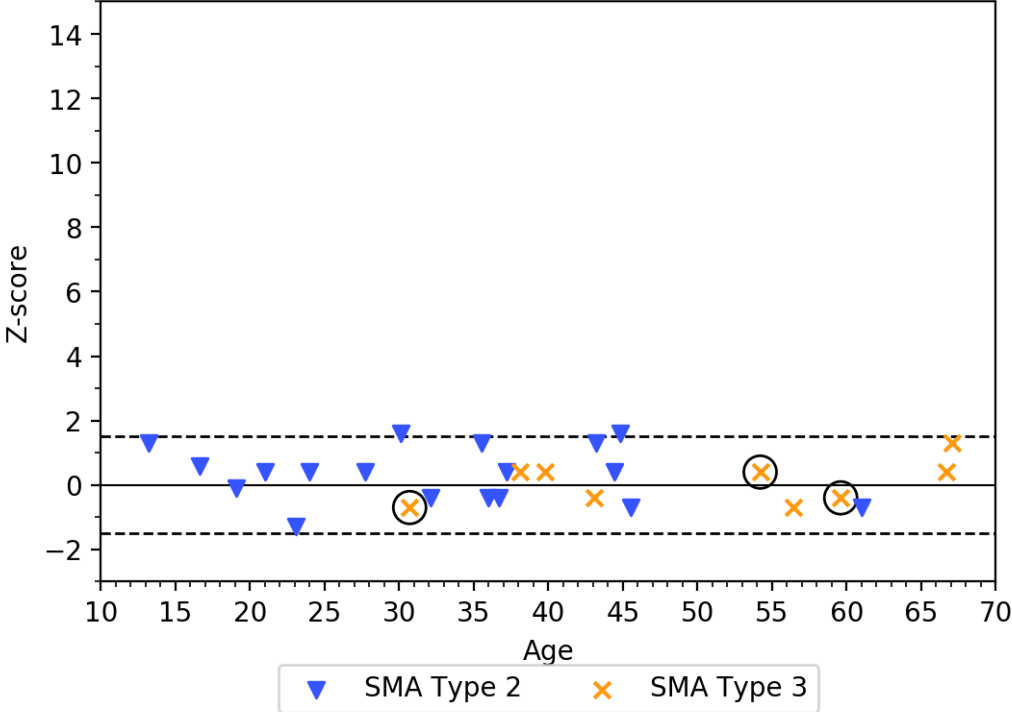

B. Masticatory cycles

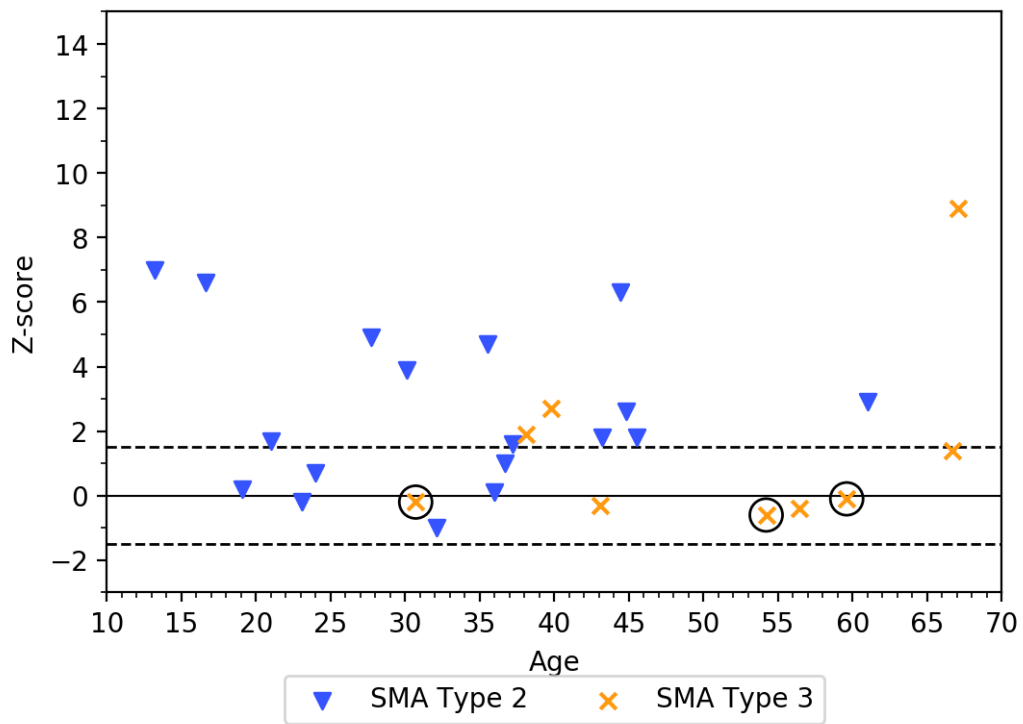

C. Swallows

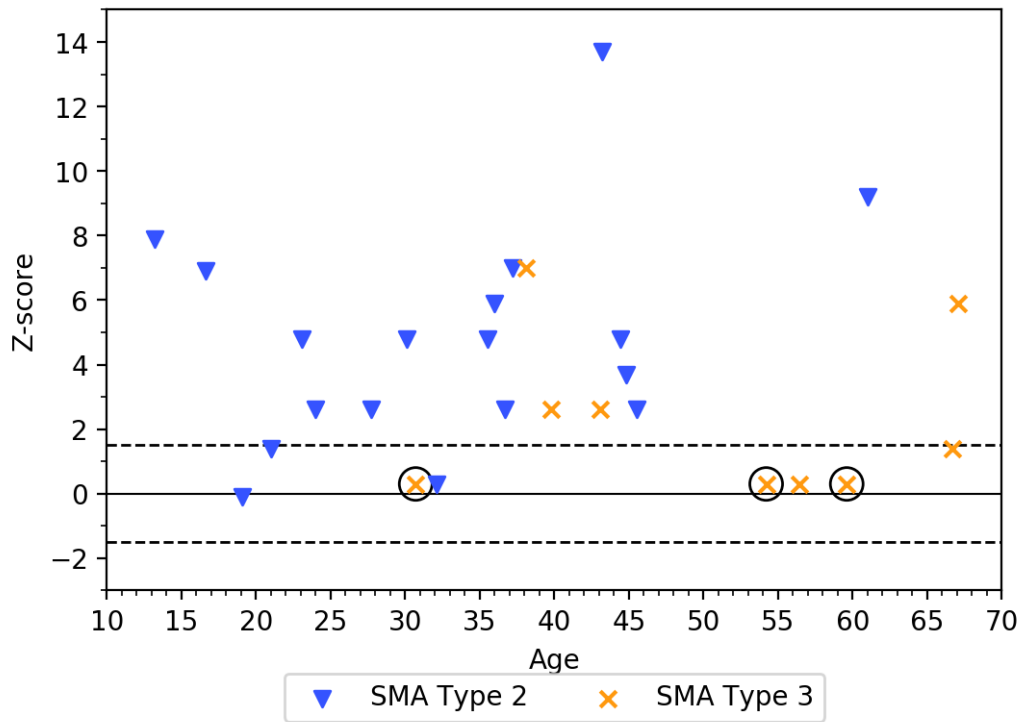

D. Time

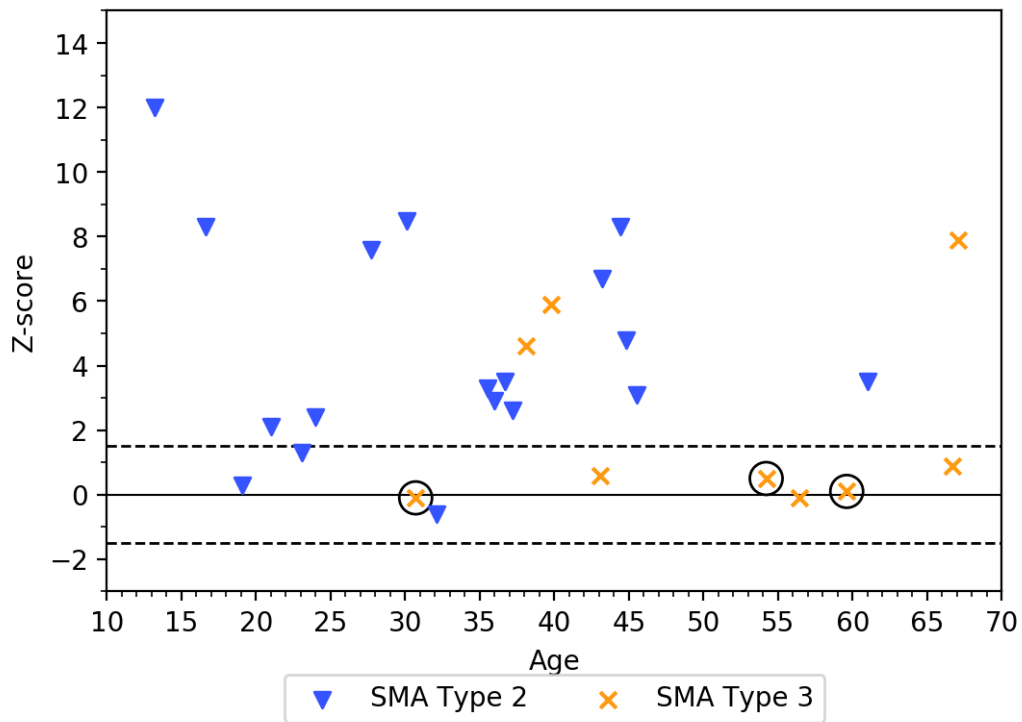

Supplement: MOESM2 [file 19571942]
