# Supplementary material for: Mastication in Patients with Spinal Muscular Atrophy Types 2 and 3 is Characterized by Abnormal Efficiency, Reduced Endurance, and Fatigue
Source: Springer Nature journal article supplement (doi:10.1007/s00455-021-10351-y), 2021-08-15
Supplement: MOESM3 [file 19571942]

Supplementary file 3

**Paper:** Mastication in patients with spinal muscular atrophy types 2 and 3 is characterized by abnormal efficiency, reduced endurance and fatigue

**Journal:** Dysphagia

**Authors:** A.M.B. van der Heul, MSc<sup>1</sup>, R.P.A. van Eijk<sup>1,2</sup>, MD, PhD, R.I. Wadman, MD, PhD<sup>1</sup>, F. Asselman, MSc<sup>1</sup>, I. Cuppen, MD, PhD<sup>1</sup>, R.A.J. Nivelstein MD, PhD<sup>3</sup>, E. Gerrits, PhD<sup>4</sup>, W.L. van der Pol, MD, PhD<sup>1\*</sup>, L. van den Engel-Hoek, PhD<sup>5\*</sup>

Z-scores of the TOMASS and 6 MMT for each patient (n=27)

|    | Age | TOMASS   |                |                    |          | 6MMT |                    |                    |
|----|-----|----------|----------------|--------------------|----------|------|--------------------|--------------------|
|    |     | SMA type | Discrete bites | Masticatory cycles | Swallows | Time | Masticatory cycles | Difference M1 – M6 |
| 1  | 13  | 2        | 1.3            | 7.0                | 7.9      | 12.0 | -2.2               | -0.3               |
| 2  | 16  | 2        | 0.1            | 6.6                | 6.9      | 8.3  | -1.8               | -0.4               |
| 3  | 19  | 2        | -0.4           | 0.5                | 0.3      | 0.9  | -0.4               | -0.1               |
| 4  | 21  | 2        | 0.4            | 1.7                | 1.4      | 2.1  | -1.9               | -1.3               |
| 5  | 23  | 2        | -1.3           | -0.2               | 4.8      | 1.3  | -0.5               | 0.9                |
| 6  | 24  | 2        | 0.4            | 0.7                | 2.6      | 2.4  | -3.0               | 1                  |
| 7  | 27  | 2        | 0.4            | 4.9                | 2.6      | 7.6  | -1.5               | -1.5               |
| 8  | 30  | 2        | 0.4            | 3.9                | 4.8      | 8.5  | -1.5               | -1.0               |
| 9  | 32  | 2        | -0.3           | -1.0               | 0.3      | -0.6 | -1.3               | -0.2               |
| 10 | 35  | 2        | 1.3            | 4.7                | 4.8      | 3.3  | -0.8               | -1.5               |
| 11 | 36  | 2        | -0.4           | 0.1                | 5.9      | 2.9  | -0.8               | 1.0                |
| 12 | 36  | 2        | -0.4           | 1.0                | 2.6      | 3.5  | -1.8               | -1.6               |

|           |           |          |             |             |            |             |             |             |
|-----------|-----------|----------|-------------|-------------|------------|-------------|-------------|-------------|
| 13        | 37        | 2        | 0.4         | 1.6         | 7.0        | 2.6         | 0           | -1.3        |
| 14        | 43        | 2        | 1.3         | 1.8         | 13.7       | 6.7         | -1.0        | -0.2        |
| 15        | 44        | 2        | 0.4         | 6.3         | 4.8        | 8.3         | -3.0        | 1           |
| 16        | 44        | 2        | 0,4         | 2.6         | 3.7        | 4.8         | -1.6        | -0.1        |
| 17        | 45        | 2        | -0.7        | 1.8         | 2.6        | 3.1         | -3.0        | 1           |
| 18        | 61        | 2        | -0.7        | 2.9         | 9.2        | 3.5         | -0.9        | -0.6        |
| <b>19</b> | <b>30</b> | <b>3</b> | <b>-1,3</b> | <b>-0.2</b> | <b>0.3</b> | <b>-0.1</b> | <b>-1.7</b> | <b>-0.1</b> |
| 20        | 38        | 3        | 0.4         | 1.9         | 7.0        | 4.6         | 2           | 2           |
| 21        | 39        | 3        | 0.4         | 2.7         | 2.6        | 5.9         | -3.0        | 1           |
| 22        | 43        | 3        | -0.4        | -0.3        | 2.6        | 0.6         | -2.0        | -1.7        |
| <b>23</b> | <b>54</b> | <b>3</b> | <b>0.4</b>  | <b>-0.6</b> | <b>0.3</b> | <b>0.5</b>  | <b>-1.1</b> | <b>0.3</b>  |
| 24        | 56        | 3        | -0.7        | -0.4        | 0.3        | -0.1        | 0.3         | 0.2         |
| <b>25</b> | <b>59</b> | <b>3</b> | <b>-0.4</b> | <b>-0.1</b> | <b>0.3</b> | <b>0.1</b>  | <b>-1.1</b> | <b>-1.1</b> |
| 26        | 66        | 3        | 0.4         | 1.4         | 1.4        | 0.9         | 0.1         | 0.4         |
| 27        | 67        | 3        | 1.3         | 8.9         | 5.9        | 7.9         | -3.0        | 1           |

TOMASS = test of mastication and swallowing solids; 6MMT = 6 minutes mastication test; Difference M1 – M6 = difference between minute 1 and minute 6

<sup>1</sup> patient could not finish the test, <sup>2</sup> test was not performed because of jaw-complaints

The bold data refer to ambulant patients

The shaded areas are patients with posterior open bites
